# Supplementary material for: Immunomodulatory drugs downregulate IKZF1 leading to expansion of hematopoietic progenitors with concomitant block of megakaryocytic maturation
Source: PubMed Central journal article supplement — Haematologica. 2018 Jun 28;103(10):1688–97. doi: 10.3324/haematol.2018.188227 (PMC6165797; doi:10.3324/haematol.2018.188227), 2018-10
Supplement: 2018_188227-Disclosures_and_Contributions.pdf [file 2018_188227-Disclosures_and_Contributions.pdf]

Haematologica  
HAEMATOL/2018/188227  
Version 4

Immunomodulatory drugs downregulate IKZF1 leading to expansion of hematopoietic progenitors with concomitant block of megakaryocytic maturation

Ailing Liu, Shirong Li, Vera Donnenberg, Jing Fu, Susanne M. Gollin, Huihui Ma, Caisheng Lu, Donna B. Stolz, Markus Y. Mapara, Sara A. Monaghan, and Suzanne Lentzsch

Disclosures: none

Contributions: A.L., S. Li. and S. Lentzsch. designed the experiments and wrote the manuscript; A.L., V.D., S.Li., J.F., H.M., C.L., S.A.M. performed the experiments; S.M.G., D.B.S., M.Y.M. provided technical expertise; all authors helped to revise and approved the final paper.
